# Supplementary material for: Indwelling stents cause severe inflammation and fibrosis of the ureter via urothelial–mesenchymal transition
Source: Springer Nature journal article supplement (doi:10.1038/s41598-023-31885-1), 2023-04-04
Supplement: MOESM1 [file 41598_2023_31885_MOESM1_ESM.pdf]

# Supplements to

## Indwelling Stents Cause Severe Inflammation and Fibrosis of the Ureter via Urothelial-Mesenchymal Transition

Alina Reicherz<sup>1,2</sup>, Felipe Eltit<sup>1,3</sup>, Kymora Scotland<sup>4</sup>, Khaled Almutairi<sup>1</sup>, Robert Bell<sup>3</sup>, Bita Mojtahedzadeh<sup>3</sup>, Michael Cox<sup>3</sup>, Ben Chew<sup>1</sup>, Dirk Lange<sup>1,\*</sup>

1 The Stone Centre at Vancouver General Hospital, Department of Urologic Sciences, University of British Columbia, Vancouver, BC, Canada.

2 Department of Urology, Marien Hospital Herne, Ruhr-University of Bochum, Herne, Germany

3 Vancouver Prostate Centre, Vancouver, BC, Canada

4 Department of Urology, UCLA David Geffen School of Medicine, Los Angeles, USA

5 College of Applied Medical Sciences, King Saud Bin Abdulaziz University for Health Sciences, Jeddah, Saudi Arabia

6 King Abdullah International Medical Research Center, Jeddah, Saudi Arabia

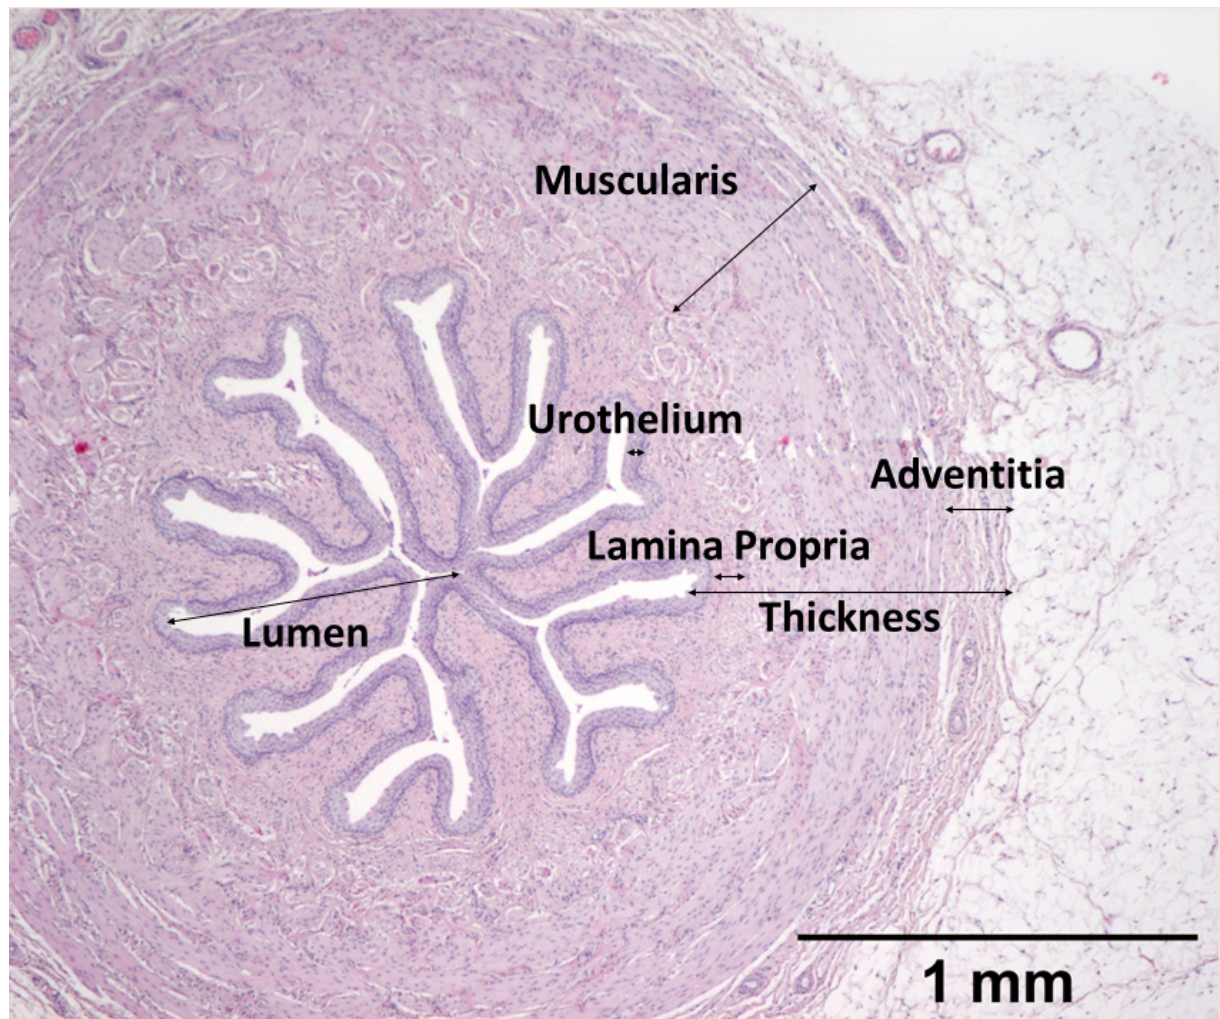

Figure S 1: Histological evaluation: Measurements of histologic dimensions (thickness of the ureter, urothelium, lamina propria, muscle layer and adventitia, diameter and lumen)

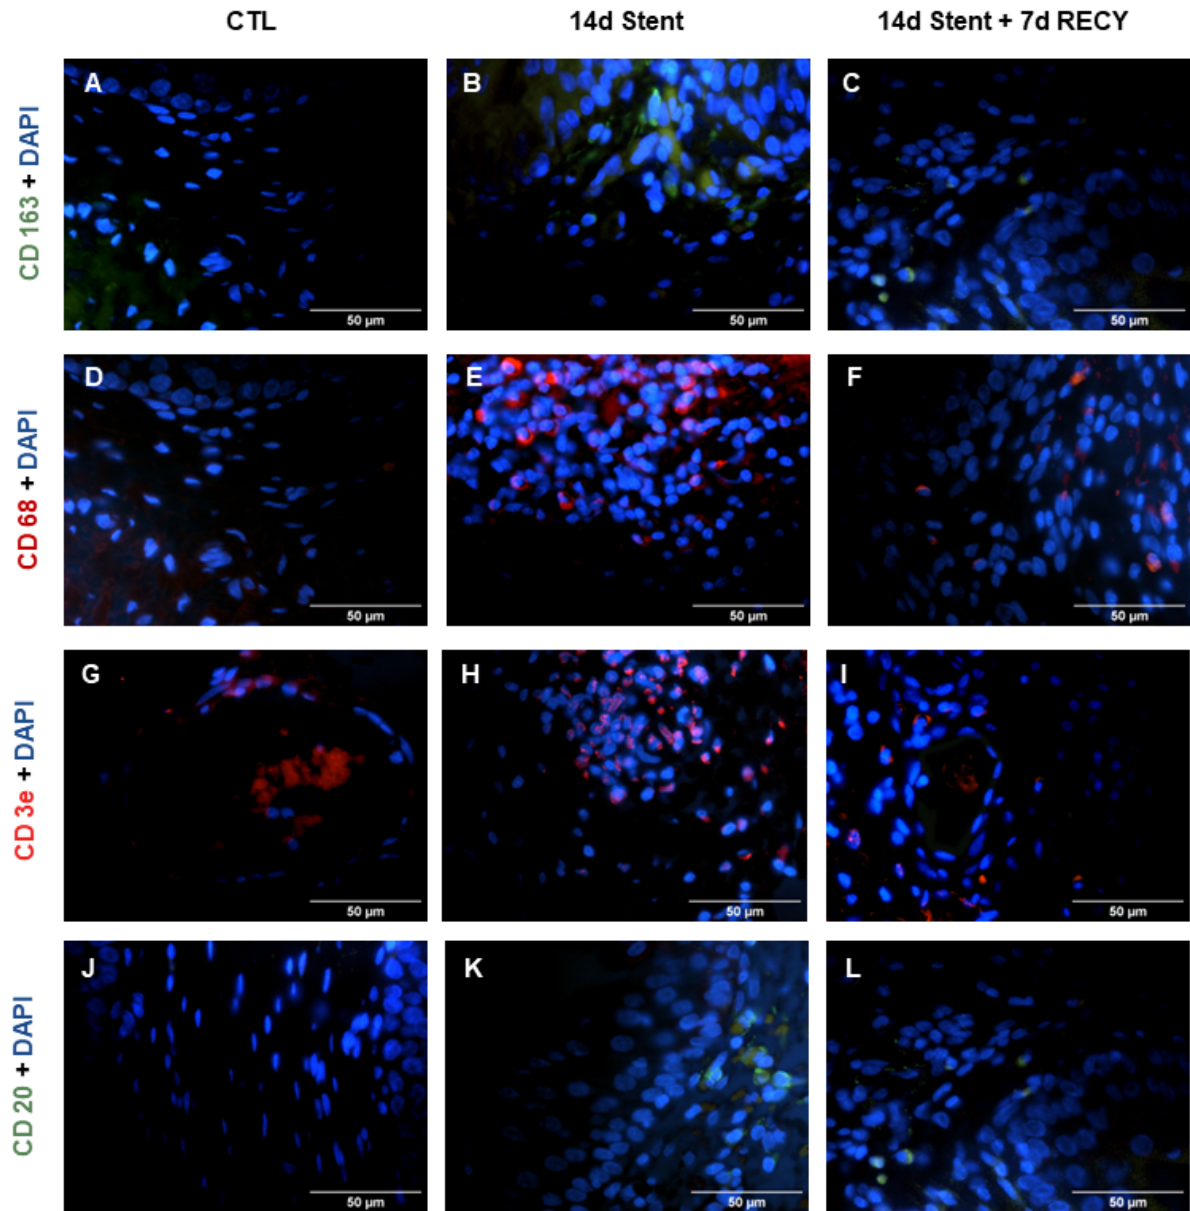

Figure S 2: Immunofluorescent staining of leucocyte subtypes in ureters. High magnification images of the showing staining for M1 macrophages (CD163), M2 macrophages (CD 68), T-cells (CD3e) and B-cells (CD20) in ureters stented for 14 days (14d Stent), stented for 14 days followed by stent removal and a 7-day recovery ( Stent + 7d RECY) and control ureters (CTL). In 14d Stent ureters clusters of T-cells are present, and M1 and M2 macrophages and B-cells diffusely infiltrate the tissue. Leucocyte infiltration partially resolves during the recovery.

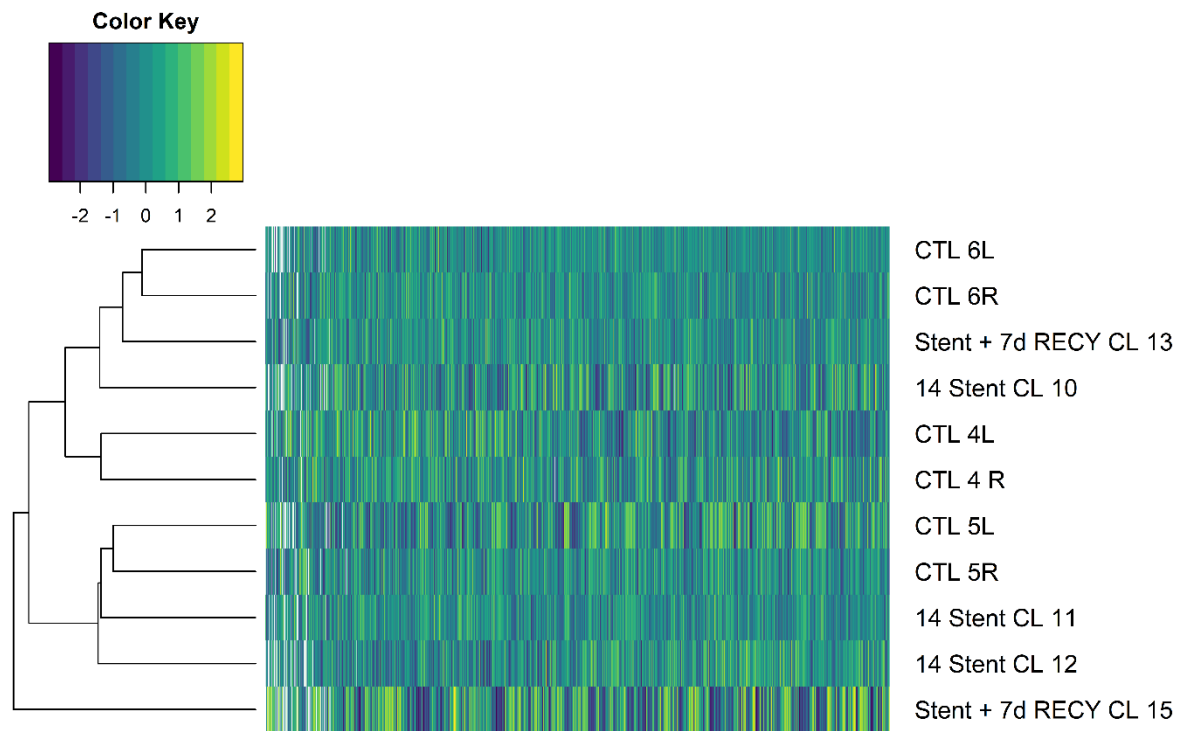

*Figure S 3: Heatmap of gene expression of contralateral ureters of pigs that were stented for 14 days (14d Stent CL) or 14 days followed by 7 days of recovery (Stent + 7d RECY CL) and control ureters (CTL). Genes with more than 5 or more missing values were deleted (n=11029)*



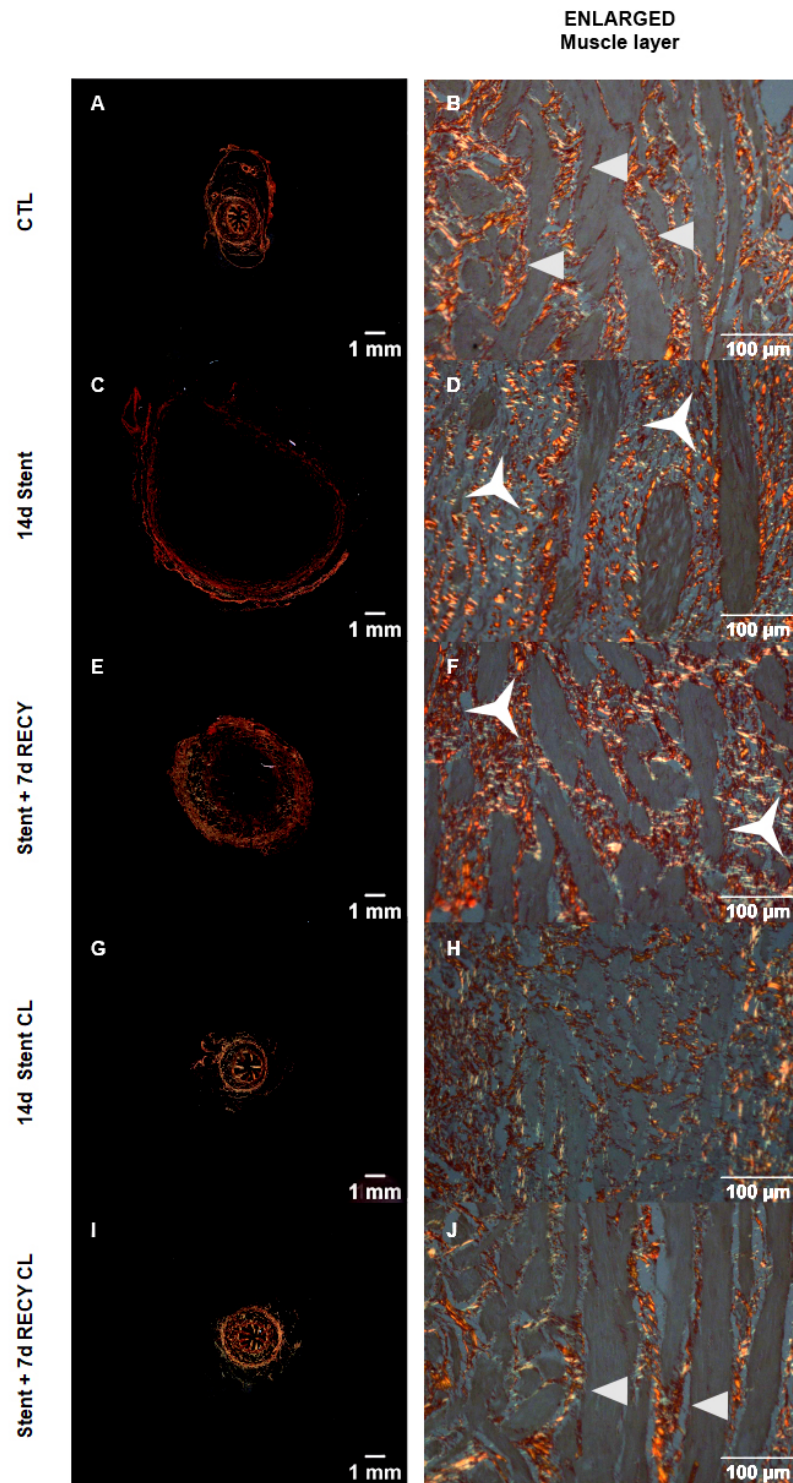

Figure S 4: Qualitative evaluation of fibrotic changes in stented ureters (A-J). (A, B) Regular collagen distribution in control ureters (CTL), (C, D) ureters stented for 14 days (14d Stent) and (E, F) 14 days followed by stent removal and recovery for 7 days (Stent + 7d RECY) and (G-J) their unstented contralateral ureters (14d Stent CL and STENT + 7D RECY CL). High magnification images of regular collagen distribution in the muscle layer (error heads in B), fibrosis (star) in 14d Stent (D) and Stent + 7d RECY (F). Low and high magnification images of Sirius red stains in polarized light.

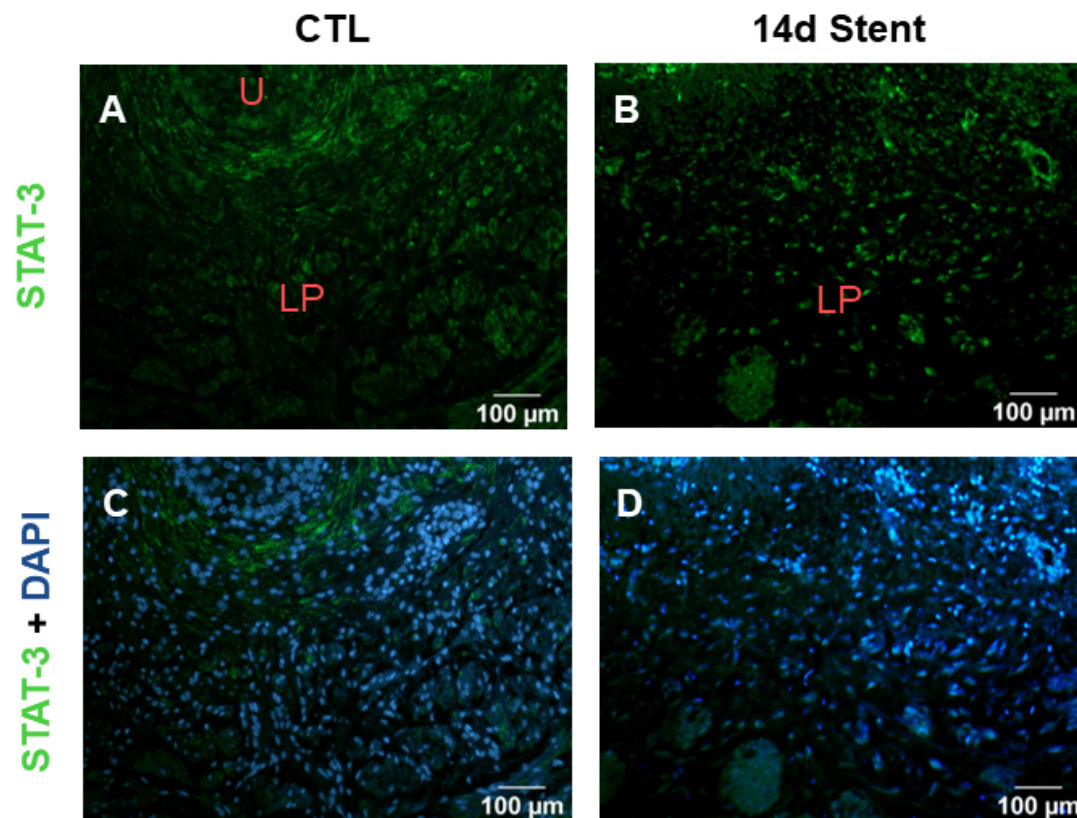

Figure S 5: Immunofluorescent staining of STAT3 in ureters. A and C shows staining for transcriptions factor STAT3 in control ureters (CTL), and B and D shows staining for STAT3 in ureters stented for 14 d (14d Stent). B and D showing positive nuclear staining for STAT3 in the lamina propria of stented ureters. U (Urothelium), LP (Lamina propria).

Table S 1: *Histological grading system for inflammation and fibrosis in porcine ureters*

|                                                | 0                                                                                                                    | 1                                                    | 2                                                        | 3                                                                                    |
|------------------------------------------------|----------------------------------------------------------------------------------------------------------------------|------------------------------------------------------|----------------------------------------------------------|--------------------------------------------------------------------------------------|
| <b>Urothelial integrity</b>                    | 4 to 6 layers of cells, forming a star-shaped lumen                                                                  | Same height, discontinuous, small vacuoles           | Reduced height, small vacuoles, discontinuous            | Significantly destructed, large vacuoles                                             |
| <b>Fibrosis – Lamina propria</b>               | Thin circumscribed layer of collagen, not infiltrating the muscle layer                                              | Mild changes                                         | Moderate changes                                         | Severe changes                                                                       |
| <b>Fibrosis – Muscle layer</b>                 | Connective tissue between fibres barely observable in the muscle layer                                               | Mild changes                                         | Moderate changes                                         | Severe changes                                                                       |
| <b>Fibrosis - Adventitia</b>                   | Thin layer of collagen coating the muscle layer; fine reticular network of collagen fibres within the adipose tissue | Mild changes                                         | Moderate changes                                         | Severe changes                                                                       |
| <b>Leucocyte infiltration – Lamina propria</b> | No observation of mononuclear cells                                                                                  | Few mononuclear cells observed                       | Diffuse infiltration of mononuclear cells                | Clusters of mononuclear cells                                                        |
| <b>Leucocyte infiltration – Adventitia</b>     | No observation of mononuclear cells                                                                                  | Few mononuclear cells observed                       | Diffuse infiltration of mononuclear cells                | Clusters of mononuclear cells                                                        |
| <b>Hyperemia – Lamina propria</b>              | Few observable blood vessels                                                                                         | Few observable blood vessels with increased diameter | Several observable blood vessels with increased diameter | Several observable blood vessels with increased diameter, erythrocytes in the tissue |
| <b>Hyperemia – Adventitia</b>                  | Few observable blood vessels                                                                                         | Few observable blood vessels with increased diameter | Several observable blood vessels with increased diameter | Several observable blood vessels with increased diameter, erythrocytes in the tissue |

Table S 2: List showing proteins differentially expressed between 14d stented and control ureters. Significance was defined as a twofold change and p-value < 0.05.

| Accession  | Description                                                | Gene Name       | Fold change | p-value  | Expression  |
|------------|------------------------------------------------------------|-----------------|-------------|----------|-------------|
| P55944     | Metallothionein-3                                          | MT3             | 6.16        | 0.025587 | upregulated |
| O79880     | NADH-ubiquinone oxidoreductase chain 3                     | MT-ND3          | 5.7         | 0.020978 | upregulated |
| F1SK41     | Amino acid transporter                                     | SLC1A1          | 4.62        | 0.001347 | upregulated |
| Q8SPS7     | Haptoglobin                                                | HP              | 4.61        | 0.023727 | upregulated |
| A0A287AIH1 | 4-hydroxyphenylpyruvate dioxygenase                        | HPD             | 4.48        | 0.000162 | upregulated |
| F1SAR7     | Uncharacterized protein                                    | CLMN            | 4.22        | 0.008995 | upregulated |
| F1SB19     | Uncharacterized protein                                    | PRPSAP2         | 4.11        | 0.011276 | upregulated |
| F1RU54     | Mitochondrial ribosomal protein L11                        | MRPL11          | 3.9         | 0.006033 | upregulated |
| A0A287A3X9 | 6-phosphofructo-2-kinase/fructose-2,6-biphosphatase 2      | PFKFB2          | 3.86        | 0.007696 | upregulated |
| A0A287BG85 | Collagen type XXVIII alpha 1 chain                         | COL28A1         | 3.83        | 0.000861 | upregulated |
| F1SQG4     | SECIS binding protein 2 like                               | SECISBP2L       | 3.18        | 0.000007 | upregulated |
| F1SGG6     | Keratin 5                                                  | KRT5            | 3.13        | 0.001043 | upregulated |
| A0A287ASW4 | Uncharacterized protein                                    | Uncharacterized | 3.07        | 0.016306 | upregulated |
| A5A766     | glycoprotein NMB                                           | GNMB            | 2.99        | 0.000049 | upregulated |
| A0A286ZQ00 | C-C motif chemokine                                        | LOC100515857    | 2.92        | 0.000236 | upregulated |
| F1SBY8     | Uncharacterized protein                                    | CROT            | 2.91        | 0.010673 | upregulated |
| I3LM79     | Dipeptidyl peptidase 9                                     | DPP9            | 2.88        | 0.000135 | upregulated |
| I3LEB7     | Uncharacterized protein                                    | PODN            | 2.87        | 0.012093 | upregulated |
| A0A286ZWQ4 | Chromosome 1 open reading frame 174                        | C1orf174        | 2.82        | 0.035859 | upregulated |
| A0A287BDA0 | Translocase of inner mitochondrial membrane 21             | TIMM21          | 2.72        | 0.044233 | upregulated |
| F1SDC2     | Acid phosphatase 6, lysophosphatidic                       | ACP6            | 2.71        | 0.035329 | upregulated |
| I3LNS9     | Alpha-L-fucosidase                                         | FUCA1           | 2.71        | 0.000049 | upregulated |
| A0A286ZVC0 | Tetratricopeptide repeat domain 7A                         | TTC7A           | 2.71        | 0.000008 | upregulated |
| F1SFW4     | Integrator complex subunit 3                               | INTS3           | 2.69        | 0.016902 | upregulated |
| F1SGD2     | Plakophilin 2                                              | PKP2            | 2.67        | 0.000321 | upregulated |
| Q9BDC3     | p27Kip1                                                    | p27Kip1         | 2.65        | 0.000074 | upregulated |
| P14287     | Osteopontin                                                | SPP1            | 2.65        | 0.000296 | upregulated |
| F1RNU6     | Uncharacterized protein                                    | Uncharacterized | 2.63        | 0.046245 | upregulated |
| F1SKT8     | Peptidylprolyl isomerase domain and WD repeat-containing 1 | PPWD1           | 2.58        | 0.002518 | upregulated |
| A0A287A6Z8 | LLGL1, scribble cell polarity complex component            | LLGL1           | 2.55        | 0.00008  | upregulated |
| Q95274     | Thymosin beta-4                                            | TMSB4           | 2.54        | 0.011691 | upregulated |
| I3LRU8     | DEAH-box helicase 36                                       | DHX36           | 2.54        | 0.030958 | upregulated |
| A0A287B7S0 | CD74 molecule                                              | CD74            | 2.45        | 0.010333 | upregulated |
| A0A287AAI1 | C-type lectin domain containing 11A                        | CLEC11A         | 2.45        | 0.048823 | upregulated |
| A0A287A9W0 | Translocating chain-associated membrane protein            | TRAM2           | 2.42        | 0.045527 | upregulated |
| B3SP85     | Gamma-interferon-inducible-lysosomal thiol reductase       | IFI30           | 2.4         | 0.014581 | upregulated |
| A0A287ARB4 | Myosin VC                                                  | MYO5C           | 2.33        | 0.035872 | upregulated |
| I3LKV0     | Uncharacterized protein                                    | SLIRP           | 2.33        | 0.013335 | upregulated |
| A0A287AD55 | DNA helicase                                               | MCM2            | 2.29        | 0.008597 | upregulated |



|            |                                                                                |                 |      |          |               |
|------------|--------------------------------------------------------------------------------|-----------------|------|----------|---------------|
| A0A075B7I9 | Uncharacterized protein                                                        | Uncharacterized | 2.28 | 0.010573 | upregulated   |
| A0A287BQ22 | O-6-methylguanine-DNA methyltransferase                                        | MGMT            | 2.24 | 0.000978 | upregulated   |
| I3L728     | Uncharacterized protein                                                        | Uncharacterized | 2.19 | 0.036262 | upregulated   |
| A0A287ASZ4 | Enah/Vasp-like                                                                 | EVL             | 2.19 | 0.010989 | upregulated   |
| Q95JC8     | Arginase-1                                                                     | ARG1            | 2.19 | 0.030694 | upregulated   |
| A0A286ZN56 | Uncharacterized protein                                                        | SEC62           | 2.17 | 0.02267  | upregulated   |
| F1SDG0     | Uncharacterized protein                                                        | SF3B4           | 2.15 | 0.007124 | upregulated   |
| A0A286ZNS9 | Ribosome production factor 2 homolog                                           | RPF2            | 2.15 | 0.007627 | upregulated   |
| A0A287B3A4 | Spectrin beta chain                                                            | SPTBN2          | 2.14 | 0.000001 | upregulated   |
| F1RSJ2     | Uncharacterized protein                                                        | TRAPPC9         | 2.12 | 0.006257 | upregulated   |
| F1RPB1     | Acyl-CoA synthetase medium chain family member 3                               | ACSM3           | 2.1  | 0.000166 | upregulated   |
| D3K5N3     | Midkine                                                                        | MDK             | 2.09 | 0.033039 | upregulated   |
| A0A287B0N7 | Nucleolar protein 3                                                            | NOL3            | 2.09 | 0.008646 | upregulated   |
| Q06AU4     | Ras-related protein Rab-34                                                     | RAB34           | 2.07 | 0.037105 | upregulated   |
| P00795     | Cathepsin D                                                                    | CTSD            | 2.06 | 0.039163 | upregulated   |
| A0A287AF99 | Glutamyl-tRNA(Gln) amidotransferase subunit C, mitochondrial                   | GATC            | 2.06 | 0.044549 | upregulated   |
| A0A286ZID7 | Transmembrane protein 41B                                                      | TMEM41B         | 2.06 | 0.002731 | upregulated   |
| F1SIC2     | Uncharacterized protein                                                        | ACP2            | 2.05 | 0.002387 | upregulated   |
| A0A287B770 | Serine and arginine rich splicing factor 10                                    | SRSF10          | 2.04 | 0.019906 | upregulated   |
| F1RVV7     | Cerebellar degeneration related protein 2 like                                 | CDR2L           | 2.04 | 0.014015 | upregulated   |
| I3LA32     | Uncharacterized protein                                                        | MINDY2          | 2.03 | 0.010377 | upregulated   |
| P80220     | TSC22 domain family protein 3                                                  | TSC22D3         | 2.01 | 0.010191 | upregulated   |
| F1SGH0     | Protein tyrosine phosphatase, receptor type G                                  | PTPRG           | 2    | 0.043435 | upregulated   |
| F1RRW5     | Angiotensin-converting enzyme                                                  | ACE             | 0.5  | 0.029883 | downregulated |
| A0A286ZTC7 | Anion exchange protein                                                         | SLC4A4          | 0.5  | 0.009279 | downregulated |
| I3LJ48     | Enoyl-CoA hydratase and 3-hydroxyacyl CoA dehydrogenase                        | EHHADH          | 0.49 | 0.002564 | downregulated |
| A0A287BMY4 | Dimethylglycine dehydrogenase                                                  | DMGDH           | 0.49 | 0.032537 | downregulated |
| F1SEN2     | Glutamate dehydrogenase 1, mitochondrial                                       | GLUD1           | 0.49 | 0.001971 | downregulated |
| A0A287B2W0 | Uncharacterized protein                                                        | ALDH4A1         | 0.49 | 0.0301   | downregulated |
| F1S8X9     | Uncharacterized protein                                                        | HOGA1           | 0.49 | 0.02846  | downregulated |
| A0A286ZID9 | Uncharacterized protein                                                        | LOC110256481    | 0.49 | 0.006968 | downregulated |
| A0A287AIJ3 | Glutathione peroxidase                                                         | GPX3            | 0.49 | 0.019163 | downregulated |
| A0A287A1E1 | Uncharacterized protein                                                        | TRIAP1          | 0.49 | 0.001885 | downregulated |
| A0A287BM32 | Nucleoporin 43                                                                 | NUP43           | 0.49 | 0.001073 | downregulated |
| A5GZW8     | Succinate dehydrogenase [ubiquinone] cytochrome b small subunit, mitochondrial | SDHD            | 0.48 | 0.004808 | downregulated |
| F1S0C3     | LYR motif containing 2                                                         | LYRM2           | 0.48 | 0.02238  | downregulated |
| A0A287AT39 | Acetyl-coenzyme A synthetase                                                   | ACSS1           | 0.47 | 0.000094 | downregulated |
| F1RWY7     | Uncharacterized protein                                                        | BPHL            | 0.47 | 0.000646 | downregulated |
| A0A286ZIR9 | Aminoadipate aminotransferase                                                  | AADAT           | 0.47 | 0.010545 | downregulated |
| A1YIZ1     | Selenide, water dikinase 2                                                     | SEPHS2          | 0.46 | 0.002826 | downregulated |
| F1S7C8     | Glutathione S-transferase alpha 4                                              | GSTA4           | 0.46 | 0.031696 | downregulated |

|            |                                                             |                 |      |          |               |
|------------|-------------------------------------------------------------|-----------------|------|----------|---------------|
| F1RNC8     | Uncharacterized protein                                     | SLC13A2         | 0.46 | 0.026586 | downregulated |
| F1S3H1     | Aldehyde dehydrogenase 6 family member A1                   | ALDH6A1         | 0.45 | 0.043802 | downregulated |
| A0A287ANI6 | 3-hydroxy-3-methylglutaryl-CoA lyase                        | HMGCL           | 0.45 | 0.009441 | downregulated |
| A0A287BLI4 | Pleckstrin homology domain containing A5                    | PLEKHA5         | 0.45 | 0.00025  | downregulated |
| F6PS90     | NAD-dependent protein deacetylase                           | SIRT3           | 0.45 | 0.039164 | downregulated |
| A0A287BMA5 | Uncharacterized protein                                     | Uncharacterized | 0.45 | 0.010951 | downregulated |
| A0A286ZRI8 | Arylsulfatase B                                             | ARSB            | 0.45 | 0.03029  | downregulated |
| F1RYP5     | CWC22 spliceosome associated protein homolog                | CWC22           | 0.44 | 0.009006 | downregulated |
| F1S9I9     | Mitochondrial amidoxime reducing component 2                | 44622           | 0.43 | 0.003124 | downregulated |
| F1S5K2     | Uncharacterized protein                                     | SLC3A1          | 0.43 | 0.003204 | downregulated |
| F1RUR0     | UDP-glucuronosyltransferase                                 | UGT2B31         | 0.43 | 0.001442 | downregulated |
| P81649     | Ribonuclease K3                                             | RNASE6          | 0.43 | 0.016503 | downregulated |
| F1RMV8     | Cell adhesion molecule 4                                    | CADM4           | 0.43 | 0.034121 | downregulated |
| P41367     | Medium-chain specific acyl-CoA dehydrogenase, mitochondrial | ACADM           | 0.42 | 0.015511 | downregulated |
| F1SLE5     | ATPase H+ transporting V1 subunit B1                        | ATP6V1B1        | 0.42 | 0.012533 | downregulated |
| Q95333     | Xaa-Pro aminopeptidase 2                                    | XPNPEP2         | 0.42 | 0.023004 | downregulated |
| Q02038     | Neurolysin, mitochondrial                                   | NLN             | 0.42 | 0.009492 | downregulated |
| I3LK75     | Nicotinate-nucleotide pyrophosphorylase [carboxylating]     | QPRT            | 0.42 | 0.013019 | downregulated |
| F1S0R9     | Sarcosine dehydrogenase                                     | SARDH           | 0.41 | 0.002468 | downregulated |
| B8XH67     | Na(+)/H(+) exchange regulatory cofactor NHE-RF              | SLC9A3R1        | 0.41 | 0.000156 | downregulated |
| I3LVF1     | Hydroxyacid oxidase 1                                       | HAO1            | 0.41 | 0.001145 | downregulated |
| A0A287ATM3 | Sulfate anion transporter 1                                 | SLC26A1         | 0.41 | 0.003349 | downregulated |
| F1SAI9     | Solute carrier family 37 member 4                           | SLC37A4         | 0.41 | 0.000438 | downregulated |
| I3LLU2     | Solute carrier family 43 member 2                           | SLC43A2         | 0.41 | 0.000143 | downregulated |
| A0A287B6X3 | Lambda-crystallin homolog                                   | CRYL1           | 0.4  | 0.000045 | downregulated |
| P00371     | D-amino-acid oxidase                                        | DAO             | 0.4  | 0.031716 | downregulated |
| F1SK21     | Ammonium transporter Rh type C                              | RHCG            | 0.4  | 0.025239 | downregulated |
| F1RTA3     | Folate gamma-glutamyl hydrolase                             | GGH             | 0.4  | 0.000861 | downregulated |
| Q35916     | Cytochrome c oxidase subunit 3                              | MT-CO3          | 0.4  | 0.010083 | downregulated |
| P37111     | Aminoacylase-1                                              | ACY1            | 0.39 | 0.000401 | downregulated |
| F1SKY2     | Nitrilase family member 2                                   | NIT2            | 0.39 | 0.00299  | downregulated |
| A0A287AAP0 | Uncharacterized protein                                     | LOC100522130    | 0.39 | 0.000847 | downregulated |
| F1SH89     | Choline dehydrogenase                                       | CHDH            | 0.39 | 0.000424 | downregulated |
| I3LQ57     | Phosphotriesterase related                                  | PTER            | 0.39 | 0.000924 | downregulated |
| F1S451     | Lactate dehydrogenase D                                     | LDHD            | 0.39 | 0.000256 | downregulated |
| A0A2C9F343 | Lysozyme                                                    | LYZ             | 0.39 | 0.008634 | downregulated |
| A0A287BK91 | Tetratricopeptide repeat domain 7B                          | TTC7B           | 0.39 | 0.000199 | downregulated |
| A0A287A9U9 | Solute carrier family 22 member 1                           | SLC22A1         | 0.38 | 0.018045 | downregulated |
| F1SPI0     | Uncharacterized protein                                     | CHCHD4          | 0.38 | 0.002712 | downregulated |
| P00636     | Fructose-1,6-bisphosphatase 1                               | FBP1            | 0.37 | 0.001701 | downregulated |
| I3LEH4     | Amine oxidase                                               | MAOB            | 0.37 | 0.018676 | downregulated |

|            |                                                                |                 |      |          |               |
|------------|----------------------------------------------------------------|-----------------|------|----------|---------------|
| F1RJH8     | Argininosuccinate lyase                                        | ASL             | 0.37 | 0.000001 | downregulated |
| Q9TRC7     | Amiloride-sensitive amine oxidase [copper-containing]          | AOC1            | 0.37 | 0.009688 | downregulated |
| F1SUP1     | Uncharacterized protein                                        | AKR7A2          | 0.37 | 0.000127 | downregulated |
| A0A286ZJA4 | Uncharacterized protein                                        | CYP2C36         | 0.37 | 0.021292 | downregulated |
| F1SD56     | MISP family member 3                                           | MISP3           | 0.37 | 0.000828 | downregulated |
| I3LQD0     | Uncharacterized protein                                        | CALML4          | 0.37 | 0.01499  | downregulated |
| F1RPB0     | Uncharacterized protein                                        | ACSM2B          | 0.36 | 0.000768 | downregulated |
| P79431     | Metallothionein-1E                                             | MT1E            | 0.36 | 0.006847 | downregulated |
| A0A287ADL4 | Polymeric immunoglobulin receptor                              | PIGR            | 0.36 | 0.009647 | downregulated |
| A0A286ZTA4 | Fructose-bisphosphate aldolase                                 | ALDOB           | 0.35 | 0.004061 | downregulated |
| I3LGB4     | Tubulointerstitial nephritis antigen                           | TINAG           | 0.35 | 0.00158  | downregulated |
| I3LEZ7     | Histone deacetylase 6                                          | HDAC6           | 0.35 | 0.000024 | downregulated |
| F1RWI8     | Secernin 2                                                     | SCRN2           | 0.35 | 0.000614 | downregulated |
| A0A287BB52 | Inositol oxygenase                                             | MIOX            | 0.35 | 0.000182 | downregulated |
| A0A287BQ20 | Uncharacterized protein                                        | Uncharacterized | 0.35 | 0.008795 | downregulated |
| F1RWC3     | Cubilin                                                        | CUBN            | 0.34 | 0.00011  | downregulated |
| P22411     | Dipeptidyl peptidase 4                                         | DPP4            | 0.34 | 0.005738 | downregulated |
| I3LTZ8     | Phenazine biosynthesis like protein domain containing          | PBLD            | 0.34 | 0.00621  | downregulated |
| F1SIX9     | Glycerate kinase                                               | GLYCTK          | 0.34 | 0.003543 | downregulated |
| F1RMF6     | Uncharacterized protein                                        | LOC100517803    | 0.34 | 0.005358 | downregulated |
| D0VWV4     | Succinate dehydrogenase cytochrome b560 subunit, mitochondrial | SDHC            | 0.34 | 0.000006 | downregulated |
| P80147     | 4-aminobutyrate aminotransferase, mitochondrial                | ABAT            | 0.33 | 0.041918 | downregulated |
| F1SND2     | Uncharacterized protein                                        | AGXT2           | 0.33 | 0.005261 | downregulated |
| I3LSX8     | Cadherin 16                                                    | CDH16           | 0.33 | 0.000022 | downregulated |
| A0A287AT21 | Sorbitol dehydrogenase                                         | SORD            | 0.33 | 0.001513 | downregulated |
| I3LQA1     | Aldehyde dehydrogenase 8 family member A1                      | ALDH8A1         | 0.33 | 0.000069 | downregulated |
| A0A287BS58 | Sarcoglycan epsilon                                            | SGCE            | 0.33 | 0.003045 | downregulated |
| P00172     | Cytochrome b5                                                  | CYB5A           | 0.33 | 0.00235  | downregulated |
| I3LSY0     | Acyl-CoA synthetase medium chain family member 4               | ACSM4           | 0.32 | 0.00107  | downregulated |
| A0A287AES5 | Phosphoenolpyruvate carboxykinase 2, mitochondrial             | PCK2            | 0.31 | 0.00004  | downregulated |
| F1RL81     | Hydroxysteroid 17-beta dehydrogenase 14                        | HSD17B14        | 0.31 | 0.000212 | downregulated |
| A0A287A2X5 | Gluconokinase                                                  | IDNK            | 0.31 | 0.005877 | downregulated |
| C0HL13     | Low-density lipoprotein receptor-related protein 2             | LRP2            | 0.3  | 0.000122 | downregulated |
| A0A287BTN2 | Succinyl-CoA:glutarate-CoA transferase                         | SUGCT           | 0.3  | 0.005814 | downregulated |
| A0A287AKZ9 | V-type proton ATPase subunit G                                 | ATP6V1G1        | 0.3  | 0.000006 | downregulated |
| F1REY0     | Uncharacterized protein                                        | VPS37B          | 0.3  | 0.00196  | downregulated |
| I3LJJ8     | PDZ domain containing 1                                        | PDZK1           | 0.29 | 0.006985 | downregulated |
| P50441     | Glycine amidinotransferase, mitochondrial                      | GATM            | 0.28 | 0.000059 | downregulated |
| I3L719     | Dipeptidase                                                    | DPEP1           | 0.28 | 0.000143 | downregulated |
| F1S1E7     | Dihydropyrimidinase                                            | DPYS            | 0.28 | 0.000206 | downregulated |
| B3VFB6     | Calbindin 1                                                    | CALB1           | 0.28 | 0.000058 | downregulated |

|            |                                                            |                 |      |          |               |
|------------|------------------------------------------------------------|-----------------|------|----------|---------------|
| F1S971     | Centrosomal protein 170B                                   | CEP170B         | 0.28 | 0.014689 | downregulated |
| I3LFP5     | PDZK1-interacting protein 1                                | PDZK1IP1        | 0.28 | 0.015207 | downregulated |
| F1SBB3     | Laminin subunit alpha 3                                    | LAMA3           | 0.27 | 0.02607  | downregulated |
| A0A286ZXK0 | Uncharacterized protein                                    | PARD6B          | 0.27 | 0.02884  | downregulated |
| F1SQH7     | Solute carrier family 27 (Fatty acid transporter) member 2 | SLC27A2         | 0.26 | 0.004386 | downregulated |
| A0A287A7R1 | N-acetyltransferase 8 (putative)                           | NAT8            | 0.26 | 0.012175 | downregulated |
| F1SRG4     | Cytochrome P450 2D6                                        | CYP2D25         | 0.25 | 0.035691 | downregulated |
| A0A287AZ62 | Uncharacterized protein                                    | CYP2C33         | 0.23 | 0.000357 | downregulated |
| A0A287AXR4 | Arylacetamide deacetylase                                  | AADAC           | 0.23 | 0        | downregulated |
| A0A287ABJ0 | Uncharacterized protein                                    | BHMT2           | 0.22 | 0.000005 | downregulated |
| F1SNP0     | Uncharacterized protein                                    | COL4A3          | 0.22 | 0.014172 | downregulated |
| F1SJM4     | Neprilysin                                                 | MME             | 0.21 | 0.000015 | downregulated |
| A0A287BCM4 | Uncharacterized protein                                    | Uncharacterized | 0.21 | 0.000848 | downregulated |
| F1RL41     | Beta-ureidopropionase 1                                    | UPB1            | 0.2  | 0.000058 | downregulated |
| B5KFA0     | Aromatic-L-amino-acid decarboxylase                        | AADC            | 0.19 | 0.000837 | downregulated |
| A0A287A9G4 | Argininosuccinate synthase 1                               | ASS1            | 0.18 | 0.000007 | downregulated |
| E7D6R2     | Betaine homocysteine methyltransferase                     | bhmt            | 0.18 | 0.000231 | downregulated |
| Q29261     | Villin-1                                                   | VIL1            | 0.17 | 0.000024 | downregulated |
| F1SUU6     | Agmatinase                                                 | AGMAT           | 0.17 | 0.000028 | downregulated |
| I3LKT6     | Solute carrier family 5 member 2                           | SLC5A2          | 0.17 | 0.000926 | downregulated |
| A0A287AT23 | Aquaporin-1                                                | AQP1            | 0.17 | 0.000232 | downregulated |
| F1S1C3     | Uncharacterized protein                                    | CA4             | 0.16 | 0.000018 | downregulated |
| I3LCS3     | Solute carrier family 23 member 1                          | SLC23A1         | 0.12 | 0.015013 | downregulated |
| A0A286ZM75 | Uncharacterized protein                                    | LOC102165484    | 0.12 | 0.000002 | downregulated |
| P79377     | Metallothionein-1D                                         | MT1D            | 0.11 | 0.004581 | downregulated |
| Q70BM6     | Solute carrier family 22 member 8                          | SLC22A8         | 0.09 | 0        | downregulated |
| F1SAM6     | FXYP domain-containing ion transport regulator             | FXYP2           | 0.06 | 0.000038 | downregulated |
